# Supplementary material
Source: PubMed Central journal article supplement (PMC18262)
Supplement: pnas_97_9_4493__1.pdf [file pnas_97_9_4493__1.pdf]

## Evolution of Antp-class Genes and Differential Expression of Hydra *Hox/paraHox* genes in Anterior Patterning

Dominique Gauchat\*, Françoise Mazet\*, Cédric Berney\* , Michèl Schummer°‡, Sylvia Kreger°, Jan Pawlowski\* and Brigitte Galliot\*•

•brigitte.galliot@zoo.unige.ch

Fig. 7) Conservation of Antp-class HDs from diploblasts to bilaterians:

- A) Deduced HD sequences of the hydra *Dlx*, *Cnot* and *CnHex* genes. Percentages on the right indicate identity and similarity rates; dashes indicate identical amino acids.
- B) For each Antp-class family, a consensus HD sequence was derived where family-specific residues are written in bold and underlined when conserved from diploblasts to bilaterians. At positions that show variable residues, numbers corresponding to the different residues are given. When only conservative substitutions were noted, the most frequent residue is given in lowercase (conservative substitutions taken into account: E/D, F/Y, I/L/V, K/R, N/Q, S/T). The number of compared sequences is given on the right. Family residues that are specific to deuterostomes (deut), protostomes (prot), diploblasts (dipl) and bilaterians (bilat) are indicated when significant.
- C) From the alignment of the family consensus sequences, an Antp-class consensus sequence was derived where the Antp-class specific residues are in bold and the variable positions indicated with a star. Highly (h) conserved or invariant (i) residues at positions which are common to most HDs classes are labelled above. The signature residues (bold) common either to the non-Hox or to the Hox/paraHox families are indicated underneath. The Prd-class specific residues are given for comparison.
- D) Complete alignment of the 240 Antp-class sequences used for the phylogenetic analyses. The sequences were sorted according to their family. For each family, a consensus sequence (cons) and the specific (spec) residues were deduced. Residues are underlined when conserved from diploblasts to bilaterians. The phylum and the species codes are given at the end of the alignment.

### A

|                    |               |            |            |             |            |              |            |
|--------------------|---------------|------------|------------|-------------|------------|--------------|------------|
| <b>Prh/Hex</b>     | 1~~~ ~~~10    | ~~~~ ~~~20 | ~~~~ ~~~30 | ~~~~ ~~~40  | ~~~~ ~~~50 | ~~~~ ~~~60   |            |
| <u>CnHex</u> Hv    | S.KKCVQVRFSSH | SQSTELERVF | LVQKYISPYE | RKQISRSLDL  | SERQIKTWFO | NRRAKWRRLK.A | AJ252185   |
| Prh Mm             | K.R-GG-----N  | D-TV---KK- | ET-----P-  | --RLAKM-Q-  | ----V----- | -----Q       | 68.3%78.3% |
| Prh Ma             | K.R-GG-----N  | D-TI---KK- | ET---L--P- | --RLAKM-Q-  | ----V----- | -----Q       | 66.7%78.3% |
| Prh Rn             | K.R-GG-----N  | D-TV---KK- | ET---L--P- | --RLAKM-Q-  | ----V----- | -----Q       | 66.7%78.3% |
| Prh Gg             | K.R-GG-----N  | E-TI---KK- | ET---L--P- | --RLAKL-Q-  | ----V----- | -----Q       | 66.7%78.3% |
| <b>Not</b>         | 1~~~ ~~~10    | ~~~~ ~~~20 | ~~~~ ~~~30 | ~~~~ ~~~40  | ~~~~ ~~~50 | ~~~~ ~~~60   |            |
| <u>Cnot</u> Hv     | C.NKRRRTIFTI  | YQLERLECEF | QQQYLVGHE  | RRYLAKDLGL  | NEVQVKVWFO | NRRIKWRKSS.L | AJ252184   |
| Not Sp             | R.A--V-----Q  | E-----Q--  | DR--M--S-  | -L--AE-N-   | S-S-----   | -----QN.     | 71.7%73.3% |
| Xlhox Xl           | K.L--I--V--P  | E-----K--  | LK--M--T-  | -VD--ST-N-  | T-T-----   | -----Q-.L    | 70% 71.7%  |
| Gnot1 Gg           | K.M--V--V--P  | E-----Q--  | LK--M--T-  | -VD--AT-R-  | T-T-----   | -----Q-.M    | 70% 71.7%  |
| Cnot2 Gg           | K.A--V-----S  | D--A---K-- | AR--M--T-  | -CL--SA-H-  | T-E-----   | -----Q-.L    | 70% 70%    |
| Flh Br             | K.S--M--S--N  | D--S---K-- | AR--M--S-  | -FL--SA-Q-  | T-A-----   | -----Q-.L    | 68.3%68.3% |
| <b>Distal-less</b> | 1~~~ ~~~10    | ~~~~ ~~~20 | ~~~~ ~~~30 | ~~~~ ~~~40  | ~~~~ ~~~50 | ~~~~ ~~~60   |            |
| <u>Dlx</u> Hv      | RTIYSS        | YQLRELNRRF | FKTQYLSLPE | KAELAETLGL  | TPTQVKIWFQ | NKRSKFKEVV.R | AJ252183   |
| Dlx1 Mm            | K.IRKP-----   | L--QA----- | QQ----A--- | R-----AS--- | -Q-----    | -----KLM.K   | 76.7%82.1% |
| D11 Jc             | K.MRKP-----   | L--QQ----- | QR----A--- | -----AS---  | -Q-----    | -R---Y-KMM.K | 75% 82.1%  |
| Dlx3 Ax            | K.IRKP-----   | --AA-Q---  | Q-A---A--- | R---AQ---   | -Q-----    | -R---KLY.K   | 75% 82.1%  |
| D11 Dm             | K.MRKP-----   | L--QQ----- | QR----A--- | R---AS---   | -Q-----    | -R---Y-KMM.K | 73.2%82.1% |
| Dlx3 Mm            | K.VRKP-----   | --AA-Q---  | Q-A---A--- | R---AQ---   | -Q-----    | -R---K-KLY.K | 73.2%78.6% |
| D11 Bf             | K.MRKP----T-  | F--QQ----- | QR----A--- | R---AQ---   | -Q-----    | -R---Y-KLM.K | 71.4%83.9% |
| Dlx7 Mm            | K.LRKP-----   | L--QH-DQ-- | QH----A--- | R-Q--AQ---  | -Q-----    | -----Y-KLL.K | 69.6%76.7% |

## B

|                    |              |                        |                      |               |            |            |      |
|--------------------|--------------|------------------------|----------------------|---------------|------------|------------|------|
| <b>Non-Hox</b>     | 1~~~ ~~~10   | ~~~~ ~~~20             | ~~~~ ~~~30           | ~~~~ ~~~40    | ~~~~ ~~~50 | ~~~~ ~~~60 |      |
| <b>Not</b> cons    | .5KR4RTiFT5  | eQLERLE3EF43QQYMGtE    | R53LA34L5Lte5QVKVWFQ | NRRIKWRKQS    | L          |            | (7)  |
| <b>emx</b> cons    | PKRIRTAFSP   | SOLL3LE3AF E3NHVVGAE   | RKQLA44L4LTETQVKVWFQ | NRRTK4KRQ3    |            |            | (8)  |
| <b>BarH1</b> cons  | K.5Rk3RT3FTd | 3QL24LE35F33QKYL223    | R53LA53LGL3Q3QVKTWYO | NRR2KWK4T     |            |            | (7)  |
| prot               | -.2-KA--A--D | 2--Q2--2S- ER-----VQ2  | -2E--HK---SD2-----   | ---T---RQT.   |            |            | (4)  |
| deut               | -.2-RS--V--E | L--MG--KR-2K-----TPD   | -2D--2S---2QL-----   | ---M---K2V.   |            |            | (2)  |
| <b>Bsh</b> cons    | 2.RRKARTVFSD | 2QL2GLE2RF E2QRYLS2PE  | R2ELA2AL2LSETQVKTWFO | NRRMKHKK22.   |            |            | (2)  |
| <b>Dlx</b> cons    | K.4RKPRTIYSS | 3QL34LNRRF Q4TOYLALPE  | RAELAA3LGLTQTOVKIWFQ | NKRKFKK34.k   |            |            | (8)  |
| <b>Msh</b> cons    | .NRKPRTPFTT  | 4QLL3LERKF 34KQYLSIAE  | RAEFS5SL4LTETQVKIWFQ | NRRAK4KRLQ.   |            |            | (11) |
| dipl               | -----2       | 2--2--2-- k222---i2-   | -2-2223-r-----i----  | -----2--3-    |            |            | (3)  |
| prot               | -----2       | Q---s-----22-----      | -----2-----          | -----2-----   |            |            | (2)  |
| deut               | -----2       | 2---A-----RQ-----      | -----N-----          | -----A-----E  |            |            | (6)  |
| <b>en</b> cons     | E.EKRPRTAFS3 | 4QL3RLK6EF 332RYL3E3R  | RQ5L26EL3LNE2QIKIWFQ | NKRAKIKK23.   |            |            | (7)  |
| <b>eve</b> cons    | .3RRYRTAFTR  | EQL4RLEKEF 3RENYVSR2R  | RCELA33LNL2ETTIK2WFO | NRRMK3KR2R.   |            |            | (7)  |
| <b>Gbx</b> cons    | K.4RR2RTAFTS | EQLLELEK2F 332KYL223   | R3QIA33L3LSE2QVKIWFQ | NRR2KWK4K.    |            |            | (5)  |
| <b>Hex</b> cons    | K.RK22QVRF2  | 3QT3ELEK2F 22QKYLSE2E  | RK2L2K3L2LSEROVKTWFO | NRRAKWRRLK.   |            |            | (4)  |
| <b>Lbx</b> cons    | K.2RKSRTAFTN | HQIYELEKRF LYQKYLSPAD  | RD2IA33LGLTNAQVITWFO | NRRRAKLKR3.E  |            |            | (4)  |
| <b>Tlx</b> cons    | .RKK3RT4FSR  | 6QV3ELEK4F 362KYL2S3E  | R33LA46Lk32D3QVK2WFO | NRR3K2KRO4.-E |            |            | (8)  |
| <b>NK-2</b> cons   | .rRK3RvLFS3  | 3Q34ELERRF k5QKYLsA4E  | Re5LA56L6LT4TQVKIWFQ | N3RYK4K4R56.  |            |            | (15) |
| dipl               | r--P-2---2   | 2-V2--2r- 22-K---2K    | 2221-22L2-T2T-V----- | r---2--Q2.    |            |            | (2)  |
| prot               | r--R-v---2   | A-32-----r32k-----P-   | -EH---I3-TPT-V-----  | H---4--33.    |            |            | (8)  |
| deut               | R--3-V--Q    | A-Vy-----KQ-r---P-     | -eH--2414-T2T-V----- | -2---3--Q3.   |            |            | (5)  |
| <b>Hox/paraHox</b> | 1~~~ ~~~10   | ~~~~ ~~~20             | ~~~~ ~~~30           | ~~~~ ~~~40    | ~~~~ ~~~50 | ~~~~ ~~~60 |      |
| <b>PG-1</b> cons   | .3474RTNFT2  | KQLTELEKEF HFNKYLTRAR  | RIEIAA5L5LNETQVKIWFQ | NRRMKQKR5.    |            |            | (10) |
| prot               | .2N42-----2  | -----3-----            | -I---33-3-----       | -----4.       |            |            | (5)  |
| deut               | .P354-----T  | -----3-----            | -V---A4-3-----       | -----E.       |            |            | (5)  |
| <b>cnox1</b> cons  | D.45RKR3sF32 | 32IveLEKEF 2y2KYLtR3R  | RvE2A53LdLte4QIKIWFQ | NRRMK3K3E3.   |            |            | (8)  |
| <b>PG-2</b> cons   | .2RRLRATAYTN | TQLLELEKEF HFNKYL3RPR  | R3EIAA3LDLTERQVKVWFQ | NRRMKHKRQT.   |            |            | (6)  |
| <b>Gsx</b> cons    | .SKRiRTAyTS  | 3QLLELEKEF 54N3YLSRLR  | RI2IA36L3LSEKQVKIWFQ | NRRVK3KK34.   |            |            | (12) |
| dipl               | K.---I---Y-- | 2-----K-- 33-R-----    | --Q--A3-D-----       | ---W--DK.K    |            |            | (7)  |
| bilat              | ---M---F--   | T-----R-- 3S-M-----    | --E--T3-N-----       | ---H--EG.     |            |            | (5)  |
| <b>PG-9</b> cons   | .6RKR3PYTK   | yQ3LELEKEF 45N5YLTR4r  | R5Ev248L3LTERQVKIWFQ | NRRMK5KK74.   |            |            | (12) |
| prot               | .5---K-----  | --3----- 45-4-I--2K    | -W---44-3-----       | ----4-44.     |            |            | (5)  |
| deut               | S.3---C----  | --T----- 4F-M-L--d-    | -4---R1-N-----       | ---M--3N.     |            |            | (7)  |
| <b>cnox3</b> cons  | .43RKR23Ys3  | 5Q14ELEKEF 4422FL4KER  | R5eL255L5LsERQvK2WFO | NRRMK4KK45.   |            |            | (8)  |
| <b>mox</b> cons    | K.3RKERTAFTK | 3QI3ELE2EF 34HNYLTLR   | RYEIAV3L4L3ERQVKVWFQ | NRRMKWKRK.V.G |            |            | (5)  |
| <b>cdx</b> cons    | T.KDKYRVVYTD | HQRELEKEF H5SRyITIR    | K3ELA64LGLSERQVKIWFQ | NRRAKERK65.   |            |            | (9)  |
| <b>cnox4</b> dipl  | P.AMRSRPCFSS | HQTRELEKEF LVCQYVTRRR  | RIELAFSLNLSEKQIKTWFO | NRRVKERKQK.   |            |            | (1)  |
| <b>Lox</b> cons    | D.NKRTRTAYST | 3QLLELEKEF Hy2KYISRPR  | RvRLA42LNLTE2HIKIWFQ | NRRMKW2K4E.   |            |            | (6)  |
| <b>PG3</b> cons    | .4KR4RTAYTS  | AQLVELEKEF HFNRYL3RPR  | RIEMA33LNLSEKQIKIWFQ | NRRMKYKkdQ.K  |            |            | (8)  |
| <b>Ftz</b> cons    | .2KRTRQTYTR  | YQTLLELEKEF HFNRyITRRR | R2dIA32L3LsERQIKIWFQ | NRRMK2KKD2.   |            |            | (3)  |
| <b>PG-4</b> cons   | .3KR3RTAYTR  | 2QvLELEKEF HFNRYLTRRR  | RIEIAH3L4LsERQIKIWFQ | NRRMKWKKdN.K  |            |            | (10) |
| prot               | .2--3-----   | 2-i-----               | -----3-3-----        | -----.        |            |            | (4)  |
| deut               | .2-----      | Q-V-----               | -----2-2-----        | -----.        |            |            | (6)  |
| <b>PG-5</b> cons   | .5KR5RT3YTR  | 3QTLLELEKEF HFNRYLTRRR | RIEIAH5L4LTERQIKIWFQ | NRRMKWKKe3.   |            |            | (9)  |
| prot               | .4--5--S---  | 3----- 23-r-----       | -----4-4-----        | -----2.       |            |            | (6)  |
| deut               | .3--3--2---  | Y-----                 | -----2-C-----        | -----2.       |            |            | (3)  |
| <b>PG-6</b> cons   | .7kr4RQTYTR  | 3QTLLELEKEF 23NRYLTRRR | RIEIA35L4LTERQIKIWFQ | NRRMKWKKe5.   |            |            | (14) |
| prot               | e.3K-4-----  | 2----- 23-r-----       | -----H3-4-----       | -----e3.N     |            |            | (6)  |
| deut               | .4r-G-----   | 3----- Hf-----         | -----34-2-----       | -----E4.      |            |            | (8)  |
| <b>PG-7</b> cons   | .RKGRQTYTR   | YQTLLELEKEF HFNRyLTRRR | RIEIAHALCLTERQIKIWFQ | NRRMKWKKEN.K  |            |            | (5)  |
| <b>PG-8</b> cons   | .rKRGRQTYtR  | 3QTLLELEKEF 4FN3YLTRrR | RIEIAH6L3LTERQIKIWFQ | NRRMK5KKE7.   |            |            | (8)  |
| prot               | .-R-----     | 3----- 4--2-----       | -----5-C-----        | -----1--5.Q   |            |            | (6)  |
| deut               | .R-----      | Y----- H-----          | -----2-2-G-----      | -----2--3.    |            |            | (2)  |

## C

|                    |            |             |             |                      |               |            |
|--------------------|------------|-------------|-------------|----------------------|---------------|------------|
|                    | 1~~~ ~~~10 | ~~~~ ~~~20  | ~~~~ ~~~30  | ~~~~ ~~~40           | ~~~~ ~~~50    | ~~~~ ~~~60 |
| <b>ANTP-CLASS</b>  | .hh.hh.hh. | .ih.hhh.h   | ....i....   | h.hhh...h....        | .hih ih.h.hh. |            |
|                    | *RK*RT*FT* | *QL*ELEK*F  | ***YLS**E   | R*ELA**L*LTE*QVKVWFQ | NRR*K*KR**    |            |
| <b>Non-Hox</b>     | KR YS      | V R R       | VT R        | IS S I I Y K RK      |               |            |
| <b>Hox/paraHox</b> | -----      | -----*      | -----S*-E   | -----*T-----         | -----*        |            |
|                    | -----      | ---L---E--- | ---N---TR-R | -I-----ER-----       | -----M-----   |            |
| <b>PRD-CLASS</b>   | -----      | -----       | -----PdI--  | -E-----E-R-Q---      | 3---A-----    |            |

D

## Antp-class Non-Hox families

| Not                            | Cnid. Ech. Vert.                                                            |
|--------------------------------|-----------------------------------------------------------------------------|
|                                | 1~~~ ~~~10~~~ ~~~20~~~ ~~~30~~~ ~~~40~~~ ~~~50~~~ ~~~60                     |
| <u>Cnot-Hv</u>                 | C.NKRRRTIFTIYQLERLECEFFQQQYLVGHERRYLAQDLGLNEVQVWVFQNRRIKWRKSS.L AJ252184    |
| Not-Sp                         | R.AKRVRTIFTQEQLERLEQEFDRQQYVMGSERLYLAAELNLSSESQVWVWFQNRRIKWRKQ.N.F AF109903 |
| Gnot1-Gg                       | K.MKRVRTVFKPEQLERLEQEFQKQQYVMGTERVLDLAATLRLTETQVWVWFQNRRIKWRKQS.M U20615    |
| Cnot2-Gg                       | K.AKRVRTIFTSDQLARLEKEFARQQYVMGTERCLLASALHLTEEQVWVWFQNRRIKWRKQS.L X98049     |
| Flh-Br                         | K.SKRMRSTFTNDQLSRLEKEFARQQYVMGSERFLLASALQLTEAQVWVWFQNRRIKWRKQS.L L48017     |
| Xelhox-Xl                      | K.LKRIRTVFTPEQLERLEKEFLKQQYVMGTERVLDLASTLNLTEQVWVWFQNRRIKWRKQS.L L19566     |
| Xnot-Xl                        | K.MKRIRTVFTPEQLERLEKEFLKQQYVMGTERVLDLASTLNLTEQVWVWFQNRRIKWRKQS.L Z19577     |
| Not cons                       | .5KR4RTiFT5eQLERLE3EF43QQYVMGtER53LA34L5LtE5QVWVWFQNRRIKWRKQS.L(7)          |
| Not-spec                       | -----I---e---E-----QQ-MVGt-----I-W-QS                                       |
| Emx (empty-spiracle)           | Cnid. Arth. Vert.                                                           |
|                                | 1~~~ ~~~10~~~ ~~~20~~~ ~~~30~~~ ~~~40~~~ ~~~50~~~ ~~~60                     |
| <u>Ems-Hys</u>                 | K.RKRHRTAFTPTQLLGLLENSFERGHYLVGDERRQLAQFLRLTETQIKVWVWFQNRRTKWKRQ.N Y11836   |
| Ems-Dm                         | K.PKRIRTAFTSPSQQLLKLEHAFESNQYVVGAEKALANLNLSETQVWVWFQNRRTKHKRMQ.Q P18488     |
| Emx1-Hs                        | ~.PKRIRTAFTSPSQQLLRLEHAFKFNHYVVGAEKQLAGLSLSETQVWVWFQNRRTKYKRQK.L Q04741     |
| Emx1-Mm                        | ~.PKRIRTAFTSPSQQLLRLEHAFKFNHYVVGAEKQLAGLSLSETQVWVWFQNRRTKYKRQK.L Q04742     |
| Emx2-Br                        | K.PKRIRTAFTSPSQQLLRLEHAFKFNHYVVGAEKQLAHSLSLSETQVWVWFQNRRTKFKRQK.L D32215    |
| Emx2-Hs                        | K.PKRIRTAFTSPSQQLLRLEHAFKFNHYVVGAEKQLAHSLSLSETQVWVWFQNRRTKFKRQK.L Q04743    |
| Emx2-Mm                        | ~.PKRIRTAFTSPSQQLLRLEHAFKFNHYVVGAEKQLAHSLSLSETQVWVWFQNRRTKFKRQK.L Q04744    |
| Emx1-Br                        | K.PKRIRTAFTSPSQQLLRLEHAFKFNHYVVGAEKQLANGLCLTETQVWVWFQNRRTKHKRQK.L D32214    |
| emx cons                       | PKRIRTAFTSPSQQLL3LE3AFE3NHVVGAEKQLA44L4LTETQVWVWFQNRRTK4KRQ3. (8)           |
| emx-spec                       | P--I--A--Ps--L----A-E-NH--VGA--kQ-----T----Q-                               |
| BarH1/BarH2                    | Cnid. Nema. Arth. Vert.                                                     |
|                                | 1~~~ ~~~10~~~ ~~~20~~~ ~~~30~~~ ~~~40~~~ ~~~50~~~ ~~~60                     |
| <u>Cnox3-Cv</u>                | K.CRKPRTVFSDLQMLVLEREFNRRKYLSTPQRTNLADRLGLNQVKTWYQNRMMKWKKE.T F X64627      |
| Ceh30-Ce                       | K.SRKARTIFTDKQLQELENTFEKQKYLVSQDRMDLAHRMGLTDTQVKTWYQNRRTKWKRQA.T Q22909     |
| Hm1d-Da                        | K.QRKARTAFTHDQLQTELEKSFERQKYLVSQERQELAHKLDLSDCQVKTWYQNRRTKWKMRQT.A P22544   |
| Barh1-Dm                       | K.QRKARTAFTHDQLQTELEKSFERQKYLVSQERQELAHKLDLSDCQVKTWYQNRRTKWKRQT.A M73259    |
| Barh2-Dm                       | K.QRKARTAFTHDQLQTELEKSFERQKYLVSQDRMELANKLELSDCQVKTWYQNRRTKWKRQT.A M82884    |
| Barx1-Mm                       | K.GRRSRTVFTTELQMLGLEKRFKQKYLSTPDRIDLAEASLGLSGLQVKTWYQNRMMKWKKIV.L Y07960    |
| Barx2-Hs                       | K.PRRSRTIFTTELQMLGLEKRFKQKYLSTPDRIDLAEASLGLTGLTQVKTWYQNRMMKWKKIV.L AF031924 |
| BarH1 cons                     | K.5RK3RT3FTd3QL24LE35F33QKYL522dR53LA53LGL323QVKTWYQNR22KWKK43. (7)         |
| BarH1 deut                     | -.2-RS--V--EL--MG--KR-2K----TPD-2D--2S---2QL-----M-----2V (2)               |
| BarH1 prot                     | -.2-KA--A--D2--Q2--2S-ER-----VQe-2E--HK---SD2-----T---RQT (4)               |
| Bsh (Brain-specific homeobox)  | Nema. Arth.                                                                 |
|                                | 1~~~ ~~~10~~~ ~~~20~~~ ~~~30~~~ ~~~40~~~ ~~~50~~~ ~~~60                     |
| Bsh-Dm                         | R.RRKARTVFSQPQLSGLLEKRFQRYLSPPEVELATALGLSETQVKTWYQNRMMKWKKQL.A L06475       |
| F31e83-Ce                      | S.RRKARTVFSQPQLSGLLEKRFQRYLSTPERIELANALNLSETQVKTWYQNRMMKWKKVV.R U55856      |
| Bsh cons                       | 2.RRKARTVFSQPQLSGLLEKRFQRYLSPPEVELATALGLSETQVKTWYQNRMMKWKK22. (2)           |
| Bsh spec                       | .R--A--V--D----G---R-E-QR----P-----A-----T-----M-H-----.                    |
| Dlx (Distal-less)              | Cnid. Arth. Chor.                                                           |
|                                | 1~~~ ~~~10~~~ ~~~20~~~ ~~~30~~~ ~~~40~~~ ~~~50~~~ ~~~60                     |
| <u>Dll-Hv</u>                  | ~~~~~RTIYSSYQLRELNRRFFKTQYLSLPEKAELAETLGLTPTQVKIWFQNKRSKFKKEVV.RA AJ252183  |
| Dll-Jc                         | K.MRKPRTIYSSYLQQLNRRFQRTQYLLALPEKAELAASLGLTQVQKIWFQNRRSKYKMM.KA AAB32450    |
| Dll-Dm                         | K.MRKPRTIYSSYLQQLNRRFQRTQYLLALPERAELAASLGLTQVQKIWFQNRRSKYKMM.KA P20009      |
| Dll-Bf                         | K.MRKPRTIYSSYQLQQLNRRFQRTQYLLALPERAELAAQLGLTQVQKIWFQNRRSKYKMLM.KQ P53772    |
| Dlx3-Ame                       | K.IRKPRTIYSSYQLAALQRRFQKAYLALPERAELAAQLGLTQVQKIWFQNRRSKFKKLY.KN Q90229      |
| Dlx1-Mm                        | K.IRKPRTIYSSYLQALNRRFQRTQYLLALPERAELAAQLGLTQVQKIWFQNRRSKFKKLY.KQ Q64317     |
| Dlx7-Mm                        | K.LRKPRTIYSSYLQHLDRQFQHTQYLLALPERAELAAQLGLTQVQKIWFQNRRSKYKMLL.KQ P70436     |
| Dlx3-Mm                        | K.VRKPRTIYSSYQLAALQRRFQKAYLALPERAELAAQLGLTQVQKIWFQNRRSKFKKLY.KN Q64205      |
| Dlx cons                       | K.4RKPRTIYSS3QL34LNRRFQ4TOYLLALPERAELAA3LGLTQVQKIWFQNKRSKFKK34. (8)         |
| Dlx spec                       | K.---P--IY-S-----N-R-Q-TQ--ALP-R-----G--Q-----S-F--L-                       |
| Msx (Muscle-specific homeobox) | Pori. Cnid. Nema. Arth. Echi. Chor.                                         |
|                                | 1~~~ ~~~10~~~ ~~~20~~~ ~~~30~~~ ~~~40~~~ ~~~50~~~ ~~~60                     |
| <u>Prox3-Ef</u>                | K.DRKPRTPFTSTQLIALERKFRQKYLVAERAEFAEYLLKLTETQVQKIWFQNRRAKAKRLH.EA L23476    |
| <u>Msh-Cv</u>                  | A.NRKPRTPFVSVNQLLTLQKFKRQYLSISERAESELLRLTETQIKIWFQNRRAKAKRQK.EA X64629      |
| <u>Msh-Hv</u>                  | A.NRKPRTPFVSVNQLLALQKFKRQYLSISERSELSVMLRLTETQIKIWFQNRRAKAKRRT.EA AJ271008   |
| Msh-Ce                         | N.NRKPRTPFSTQQLISLERKFKQYLSIAERAEFSASLQLETQVQKIWFQNRRAKAKRLQ.EA Q09604      |
| Msh-Dm                         | P.NRKPRTPFTTQQLLSLEKFKRQYLSIAERAEFSASLRLTETQVQKIWFQNRRAKAKRLQ.EA P13297     |
| Msx-Sp                         | T.NRKPRTPFTTQQLLALERKFRQKQYLSIAERAEFSASLNLTEQVQKIWFQNRRAKAKRLQ.EA AF042653  |
| Msx-Hsp                        | ~.MRKPTTPFTTQQLLALERKFRQYLSIAERAEFSASLNLTEQVQKIWFQNRRAKAKRLQ.EA U61846      |
| Msx-Bf                         | T.NRKPRTPFTTQQLLALERKFRQKQYLSIAERAEFSASLNLTEQVQKIWFQNRRAKAKRLQ.EA AJ130766  |
| Mshb-Br                        | T.NRKPRTPFTTQQLLSLEKFKRQYLSIAERAEFSASLNLTEQVQKIWFQNRRAKAKRLQ.EA Q03356      |
| Msh-Mm                         | P.NRKPRTPFTTQQLLSLEKFKRQYLSIAERAEFSASLRLTETQVQKIWFQNRRAKAKRLQ.EA P13297     |
| Msx2-Mm                        | T.NRKPRTPFTTQQLLALERKFRQKQYLSIAERAEFSASLNLTEQVQKIWFQNRRAKAKRLQ.EA Q03358    |
| Msh cons                       | .NRKPRTPFTT4QLL3LERKF34QYLSIAERAEFS5SL4LTETQVQKIWFQNRRAK4KRLQ.EA (11)       |
| Msh dipl                       | -----22---2--2--k222---i2--2-2223-r-----i-----2--3-. (3)                    |
| Msh prot                       | -----Q-----S-----2-----2-----2-----2-----2-----2. (2)                       |
| Msh deut                       | -----2---A-----RQ-----N-----A-----A-----A-----A-----A. (6)                  |
| Msx spec                       | .N--P--P--t---L---K-r-KQ---IA--A-F--S-----A-----LQ                          |

| <b>Engrailed (en)</b> |                                                                      | <b>Nema. Arth. Echi. Chor.</b>       |  |
|-----------------------|----------------------------------------------------------------------|--------------------------------------|--|
|                       | 1~~~ ~~~10~~~ ~~~20~~~ ~~~30~~~ ~~~40~~~ ~~~50~~~ ~~~60              |                                      |  |
| Ceh16-Ce              | E. EKRPRTAFTGDLRLKTEFRESRYLTERRRQELAHGLNESQIKIWFQNKRAKLLKST.S        | P34326                               |  |
| en-Dm                 | D. EKRPRTAFSSQLARLKRREFNENRYLTERRRQQLSSELGLNEAQIKIWFQNKRAKIKKST.G    | P02836                               |  |
| inv-Dm                | E. DKRPRTAFSGTQLARLKHFEFNENRYLTERRRQQLSSELGLNEAQIKIWFQNKRAKLLKSS.G   | P05527                               |  |
| en-Afr                | D. EKRPRTAFTAEQLSRLKHEFNENRYLTERRRQDLARELGLHENQIKIWFQNNRAKLLKSS.G    | Q05640                               |  |
| En-Tg                 | D. EKRPRTAFSASQLQRLKQEFQSSNYLTERRRSLAKELTLSESQIKIWFQNKRAKIKKAS.G     | P09532                               |  |
| Amphien-Bf            | E. EKRPRTAFTSEQLQRLKKEFQENRYLTERRRQDLARELKLNESQIKIWFQNKRAKIKKAA.G    | U82487                               |  |
| En-Br                 | E. DKRPRTAFTAEQLQRLKNEFNENRYLTERRRQALAQELGLNESQIKIWFQNKRAKIKKAT.G    | P31533                               |  |
| en cons               | E. EKRPRTAFS34QL3RLK6EF332RYLTERRRQ5L26EL3LNE2QIKIWFQNKRAKIKK23.     | (7)                                  |  |
| en spec               | E. E--P--A-----R-K-----T--R-Q---E---N-----K-A-I----.G                |                                      |  |
| <b>Eve</b>            |                                                                      | <b>Cnid. Arth. Vert.</b>             |  |
|                       | 1~~~ ~~~10~~~ ~~~20~~~ ~~~30~~~ ~~~40~~~ ~~~50~~~ ~~~60              |                                      |  |
| <u>Eve-Acf</u>        | R. TRRYRTAFTREQLSRLEKEFLRENYVSRTRRSELASMLNLSETTIKIVWFQNRMMKAKRRR.M   | S36770                               |  |
| <u>Antheve-Nve</u>    | . TRRYRTAFTREQLKRLKEKFEFMYENYVSRTRRCELANALNLSETTIKIVWFQNRMMKSKRRR.M  | Finnerty, 1998                       |  |
| Eve-Sa                | I. TRRYRTAFTREQLARLEKEFEFYKENVSRPRRCELASQLNLPETIKVWFQNRMMKDKRQR.M    | Z11845                               |  |
| Eve-Dm                | S. VRRYRTAFTRDQLGRLEKEFEFYKENVSRPRRCELAAQLNLPETIKVWFQNRMMKDKRQR.I    | P06602                               |  |
| Evx2-Br               | Q. VRRYRTAFTREQIGRLEKEFEFYKENVSRPRRCELAAALNLPETTIKIVWFQNRMMKDKRQR.L  | X99290                               |  |
| Evx1-Mm               | Q. MRRYRTAFTREQIARLEKEFEFYKENVSRPRRCELAAALNLPETTIKIVWFQNRMMKDKRQR.L  | P23683                               |  |
| Evx2-Mm               | Q. VRRYRTAFTREQIARLEKEFEFYKENVSRPRRCELAAALNLPETTIKIVWFQNRMMKDKRQR.L  | P49749                               |  |
| eve cons              | . 3 RRYRTAFTREQL4RLEKEF3RENYVSR2RCELA33LNL2ETTIK2WFQNRMMK3KR2R.      | (7)                                  |  |
| eve spec              | . ---Y--A--RE--R---E--REN---R-R-C-----N---T-----M-----R.             |                                      |  |
| <b>Gbx</b>            |                                                                      | <b>Nema. Vert.</b>                   |  |
|                       | 1~~~ ~~~10~~~ ~~~20~~~ ~~~30~~~ ~~~40~~~ ~~~50~~~ ~~~60              |                                      |  |
| F33d114-Ce            | . KMRRPRTAFSSQLVQLEKQFSDNRYLSRPRRYQLAQQLSLSETQIKIWFQNRMMKMKRCP.S     | AF039720                             |  |
| Gbx2-Hs               | . KNRRRRRTAFTSEQLLELEKEFEFHCKKYLSTERSQIAHALKLSSEVQVKIWFQNRRAKWKRVK.A | P52951                               |  |
| Gbx2-Mm               | . KNRRRRRTAFTSEQLLELEKEFEFHCKKYLSTERSQIAHALKLSSEVQVKIWFQNRRAKWKRVK.A | P48031                               |  |
| Hmx7-Gg               | . KSRRRRRTAFTSEQLLELEKEFEFHCKKYLSTERSQIAHALKLSSEVQVKIWFQNRRAKWKRIK.A | P15142                               |  |
| Hlxb9-Hs              | . KCRPRTAFTSQQLLELEHGHQFKFNKYLSPKRFEVATSLMLTETQVKIWFQNRMMKWKRSK.K    | P50219                               |  |
| Gbx cons              | . K4RR2RTAFTSEQLLELEK2F332KYL223R3QIA33L3LSE2QVKIWFQNR2KWKRA4K.      | (5)                                  |  |
| Gbx spec              | K-----A--SE--L-----K-----Q-----W---K                                 |                                      |  |
| <b>Prh/Hex</b>        |                                                                      | <b>Cnid. Vert.</b>                   |  |
|                       | 1~~~ ~~~10~~~ ~~~20~~~ ~~~30~~~ ~~~40~~~ ~~~50~~~ ~~~60              |                                      |  |
| <u>CnHex-Hv</u>       | . SKKCVQVRFSSHQSSTELERVLVQKYISPYERKQISRSLDLSEKQIKTWFQNRRAKWRRLK.A    | AJ252185                             |  |
| Prh-Hs                | . KRKGGQVRFVSNQDQIELEKFFETQKYLSPPERKRLAKMLQLSERQVKTWFQNRRAKWRRLK.Q   | Q03014                               |  |
| Prh-Mm                | . KRKGGQVRFVSNQDQIELEKFFETQKYLSPPERKRLAKMLQLSERQVKTWFQNRRAKWRRLK.Q   | P43120                               |  |
| Prh-Gg                | . KRKGGQVRFVSNQDQIELEKFFETQKYLSPPERKRLAKMLQLSERQVKTWFQNRRAKWRRLK.Q   | Q05502                               |  |
| Hex cons              | KR K22QVRFV23QT3ELEK2F22QKYLSP2ERK2L2K3L2LSE2QVKTWFQNRRAKWRRLK.      | (4)                                  |  |
| Hex spec              | ----QVR----T-----QK--SP--K--K-----R--T-----A-W--LK.                  |                                      |  |
| <b>Ladybird</b>       |                                                                      | <b>Arth. Vert.</b>                   |  |
|                       | 1~~~ ~~~10~~~ ~~~20~~~ ~~~30~~~ ~~~40~~~ ~~~50~~~ ~~~60              |                                      |  |
| Ladyb1-Dm             | . KKRKSRTAFTNHQIFELEKRFYQKYLSPADRDEIAASLGLSNAQVITWFQNRRAKQKRD1.E     | Y08821                               |  |
| Ladyb2-Dm             | . KKRKSRTAFTNHQIFELEKRFYQKYLSPADRDEIAGGLGLSNAQVITWFQNRRAKLLKRD1.E    | Y08822                               |  |
| Lbx1-Hs               | . KKRKSRTAFTNHQIYELEKRFYQKYLSPADRQIAQQLGLTNAQVITWFQNRRAKLLKREL.E     | P52954                               |  |
| Lbx1-Mm               | . KKRKSRTAFTNHQIYELEKRFYQKYLSPADRQIAQQLGLTNAQVITWFQNRRAKLLKRD1.E     | P52955                               |  |
| Lbx cons              | . K2RKSRTAFTNHQIYELEKRFYQKYLSPADR2IA33LGLTNAQVITWFQNRRAKLLKRD3.E(4)  |                                      |  |
| Lbx spec              | . K---S--A--NH--Y---R-LYQK---PAD-D-I----G--NA--IT-----A-L--D-        |                                      |  |
| <b>Tlx/Hox11</b>      |                                                                      | <b>Pori. Nema. Arth. Echi. Vert.</b> |  |
|                       | 1~~~ ~~~10~~~ ~~~20~~~ ~~~30~~~ ~~~40~~~ ~~~50~~~ ~~~60              |                                      |  |
| <u>Emh3-Em</u>        | R. RKKARTAFSREQVAELEKFFQDKKYLSSAERGLAEKLLKLSDMQVKTWFQNRMMKYKRQS.EE   | U97664                               |  |
| <u>Prox2-Ef</u>       | ~. RKKARTAFSREQVAELEKFFQDKKYLSSSTERGELAEKLLKLSDMQVKTWFQNRMMKYKRQS.EE | L10985                               |  |
| Ceh9-Ce               | ~. RKKARTAFSREQVAELEKFFQDKKYLSSSTERGELAEKLLKLSDMQVKTWFQNRRTKWKKIE.~  | P56407                               |  |
| Hox11-Dm              | K. RKKPRTSFTRIQVAELEKRFHFKYKYLASAERAAALARGLKMTDAQVKTWFQNRRTKWRRT.AE  | Z22959                               |  |
| Hmx-Stp               | K. KKKTRTVFSRSQVFLQESTFVFKRYLSSSERAGLAANLHLETQVKIWFQNRRTKWRRT.AA     | D85079                               |  |
| Hox11-Hs              | K. KKKPRTSFTRLQICELEKRFHFKYKYLASAERAAALAKKMTDAQVKTWFQNRRTKWRRT.AE    | P31314                               |  |
| Hox11-Mm              | K. KKKPRTSFTRLQICELEKRFHFKYKYLASAERAAALAKKMTDAQVKTWFQNRRTKWRRT.AE    | P43345                               |  |
| Tlx3-Gg               | K. RKKPRTSFTSRVQICELEKRFHFKYKYLASAERAAALAKSLKMTDAQVKTWFQNRRTKWRRT.AE | AF071875                             |  |
| Tlx cons              | . RKK3RT4FSR6QV3ELEK4F362KYL2S3ER33LA46LK32D3QVK2WFQNR3K2KRO4.-E(8)  |                                      |  |
| Tlx-specif            | . R--P-----R-----K-----S-----K-----T-----T-W--Qs.-E                  |                                      |  |

| NK-2            |                                                                   | Pori. Cnid. Plat. Nema. Arth. Uro. Chor. |          |
|-----------------|-------------------------------------------------------------------|------------------------------------------|----------|
|                 | 1~~~ ~~~10~~~~ ~~~20~~~~ ~~~30~~~~ ~~~40~~~~ ~~~50~~~~ ~~~60      |                                          |          |
| <u>Prox1-Ef</u> | K.KRRPRALFSHAQVYELERRFAVQKYLTAHEQSKLATVHLTETQVKIWFQNRRYKSKRQ.Q    | I                                        | L10984   |
| <u>Nk2-Hv</u>   | S.RKKPRILFSQSQVMELGKKFKDQKYLASERDQIANLNLTPQVKIWFQNKRYKCKKQT.I     | I                                        | AF012538 |
| Hbx3-Eg         | S.QSKRRVLFNKFQISQLEKRLKQ?RYLTAQERQELAHTIGLTPQVKIWFQNHAYKMKRRL.F   | H                                        | P42585   |
| Dth2-Gt         | Q.RRKRRLFSQAQIYELERRFKQKYLAPEREHLANLNLTPQVKIWFQNHRYKCKRSQ.K       | K                                        | Q00401   |
| Dth1-Gt         | K.KRKRRLFSKQIILELERRFRQKYLAPEREHLANLIGLSPQVKIWFQNHRYKMKRAH.H      | K                                        | Q00400   |
| Ceh22-Ce        | K.KRKRRLFTKAQTYELEERRFRSQKYLAPEREALAMQIRLTPQVKIWFQNHRYKTKKSH.T    | T                                        | P41936   |
| Tin-Dm          | M.KRKRRLFSQAQVLELECRFRLLKYLTAEREIAQKLNLSATQVKIWFQNRRYKSKRQD.I     | I                                        | P22711   |
| Nk2-Dm          | K.KRKRRLFTKAQTYELEERRFRQKYLAPEREHLASLIRLTPQVKIWFQNHRYKTKRAQ.N     | N                                        | P22808   |
| Nk4-Dm          | M.KRKRRLFSQAQVLELECRFRLLKYLTAEREIAQKLNLSATQVKIWFQNRRYKSKRQD.I     | I                                        | D33976   |
| Vnd-Dm          | K.KRKRRLFTKAQTYELEERRFRQKYLAPEREHLASLIRLTPQVKIWFQNHRYKTKRAQ.N     | N                                        | P22808   |
| Nkx-Ci          | T.RRKRRLFSQAQVFELEERRFKQKYLAPEREHLAQLMLKLTSTQVKIWFQNRRYKCKRMR.Q   | Q                                        | AB012666 |
| Nk21-Bf         | Q.RRKRRLFSQAQVYELERRFKQKYLAPEREHLAQLINLTPQVKIWFQNHRYKCKRQD.K      | K                                        | AF077840 |
| Nk25-Mm         | R.RRKRRLFSQAQVYELERRFKQKYLAPEREHLASLKLSTQVKIWFQNRRYKCKRQR.Q       | Q                                        | P42582   |
| Nkx26-Mm        | P.QRKRRLFSQAQVLALEERRFKQKYLAPEREHLASALQLSTQVKIWFQNRRYKSKSRQ.Q     | Q                                        | P43688   |
| Tcf1-Rn         | P.RRKRRLFSQAQVYELERRFKQKYLAPEREHLASMIHLTPQVKIWFQNHRYKMKRQA.K      | K                                        | P23441   |
| NK-2 cons       | .rRK3RvLFS33Q34ELEERRfk5QkYLSA4Ere5LA5616LT4TOVKIWFQ3RYK4Kr56.    | (15)                                     |          |
| dipl            | r--P-2---22-V2--2rr-22-K---2-2221-22L2-T2T-V-----r---2-rQ2.       | (2)                                      |          |
| prot            | k--R-y---2A-32-----r32k---P--EH---I3-TPT-Y-----H---4-R33.         | (8)                                      |          |
| deut            | R--3-V---QA-Vy-----KQ-r---P--eH--2414-T2T-V-----2---3-RQ3.        | (5)                                      |          |
| NK-2 spec       | R-----VL--QA--Y---R-k-Qk---AP--eH-----P-----Y-----.               |                                          |          |
| <b>Orphans</b>  |                                                                   | <b>Plat. Neme. Arth.</b>                 |          |
|                 | 1~~~ ~~~10~~~~ ~~~20~~~~ ~~~30~~~~ ~~~40~~~~ ~~~50~~~~ ~~~60      |                                          |          |
| Nk-Ls           | K.PRRARTAFYEQQLVALENKFKTRYLSVCERLNLALSINLTPQVKIWFQNRRTKWKQKN.     |                                          | Y16575   |
| Bcd-Dm          | R.PRRTRTFTTSSQIAELQHFLLQGRYLTAAPRLADLSAKLALGTAQVKIWFQNRRRRHKIQS.D |                                          | P09081   |
| Hbx4-Eg         | .SRRERTIYTPQLEAMEEVFVGNRYPDVSMREELASRLGINESKIQVWFQNRRAKLRNLE.     |                                          | P55813   |

## Antp-class Hox/paraHox\* families

| PG-1               |                                                                  | Plat. Neme. Ann. Arth. Chor. |          |
|--------------------|------------------------------------------------------------------|------------------------------|----------|
|                    | 1~~~ ~~~10~~~~ ~~~20~~~~ ~~~30~~~~ ~~~40~~~~ ~~~50~~~~ ~~~60     |                              |          |
| Pnox3-Pn           | N.NISVRTNFTTKQLTELEKEFHFNQYLTRARRIEIASKMTLSETQIKIWFQNRMMKQKRRQ.K | K                            | L41848   |
| Lab-Dm             | T.NNSVRTNFTTKQLTELEKEFHFNRYLTRARRIEIANLQLNETQVKIWFQNRMMKQKRRV.K  | K                            | P10105   |
| Hox1-Ls            | Q.PNTGRNFTTKQLTELEKEFHFNKYLTRARRIEIAAALGLNETQVKIWFQNRMMKQKRRM.K  | K                            | Y16570   |
| Lox7-Ht            | S.NNLGRNFTTKQLTELEKEFHFNKYLTRARRIEIASTLGLNETQVKIWFQNRMMKHKRRL.K  | K                            | Y10888   |
| Lab-Nvi            | Q.PNMGRTNFTTKQLTELEKEFHFNKYLTRARRIEIAAALGLNETQVKIWFQNRMMKQKRRM.K | K                            | AF151663 |
| Hox1-Bf            | G.PNNGRTNFTTKQLTELEKEFHFKYLTRARRVEIAAALNLSNETQVKIWFQNRMMKQKRRM.K | K                            | Z35142   |
| Ghox1ab-Gg         | Q.PNTIRTNFTTKQLTELEKEFHFNKYLTRARRVEIAATLELNETQVKIWFQNRMMKQKRRM.K | K                            | P31259   |
| Hoxal-Mm           | Q.PNAVRTNFTTKQLTELEKEFHFNKYLTRARRVEIAASLQLNETQVKIWFQNRMMKQKRRM.K | K                            | P09022   |
| Hoxb1-Mm           | Q.GGLGRNFTTKQLTELEKEFHFNKYLTRARRVEIAATLELNETQVKIWFQNRMMKQKRRM.K  | K                            | P17919   |
| Hoxd1-Mm           | P.PSAIRTNFNSKQLTELEKEFHFNKYLTRARRIEIAANCQLNDTQVKIWFQNRMMKQKRRM.K | K                            | Q01822   |
| PG-1 cons          | .3474RTNFTTKQLTELEKEFHFNKYLTRARRIEIAA5L5LNETQVKIWFQNRMMKQKRR5.K  | (10)                         |          |
| prot               | .2N42-----2-----3-----I---33-3-----4.                            | (5)                          |          |
| deut               | .P354-----V-----A4-3-----E.                                      | (5)                          |          |
| PG-1 spec          | .PN*---NF-TK--T-----HF-K---A-----A---N-T-----Q--R-.              |                              |          |
| <b>Cnox-1</b>      |                                                                  | <b>Cnid.</b>                 |          |
|                    | 1~~~ ~~~10~~~~ ~~~20~~~~ ~~~30~~~~ ~~~40~~~~ ~~~50~~~~ ~~~60     |                              |          |
| <u>Antp Acf</u>    | S.NKKRFTFTQRLVLELEKEFHFNKYLTRARRIEIASNLDLTERQIKIWFQNRMMKWKREL.   |                              | S36771   |
| <u>Anthox6 Nve</u> | P.SQKKRFTFTQRLVLELEKEFHFNKYLTRARRIEIATLKLTEMQIKIWFQNRMMKWKGEF.K  |                              | AF085282 |
| <u>Cnox-1 Pc</u>   | E.LSKKRVCFSQKQIVELEKEFHFNKYLTRARRVEISHTLDLTEAQIKIWFQNRMMKHKREQ.K | K                            | X81455   |
| <u>Cnox-5 Ed</u>   | D.ICKKRVCFTQKQIVELEKEFHFNRYLTRARRVEIAQLLKLTEAQIKIWFQNRMMKQKREQ.D | D                            | U41842   |
| <u>Cnox-1 Cv</u>   | E.SFRKRCSFGHRKIELELEKFKYNYLTRDRRLEFARNLDESQIKVWFQNRMMKQKKEQ.T    | T                            | X64625   |
| <u>Cnox-1 Hv</u>   | D.AFRKRCSFGHRKIELELEKFKYNYLSRDRRVEFARNLDESQIKIWFQNRMMKQKKEQ.T    | T                            | AJ252181 |
| <u>Cnox-4 Hm</u>   | D.AFRKRCSFGHSKIIELEKFKYNYLSRDRRVEFARNLDESQIKIWFQNRMMKQKKEQ.T     | T                            | S39067   |
| <u>Cnox-3 Hv</u>   | D.AFRKRCSFGHSKIIELEKFKYNYLSRDRRVEFARNLDESQIKIWFQNRMMKQKKEQ.T     | T                            | L22787   |
| cnox1 cons         | D.45RKR3sF3232IvLEKEF2y2KYLtR3RrvE2A53LdLtE4QIKIWFQNRMMK3K3E3.   | (8)                          |          |
| cnox1 spec         | D.---K---F--r--v-----Y-K-----d-----E-                            |                              |          |
| <b>PG-2</b>        |                                                                  | <b>Ann. Arth. Chor.</b>      |          |
|                    | 1~~~ ~~~10~~~~ ~~~20~~~~ ~~~30~~~~ ~~~40~~~~ ~~~50~~~~ ~~~60     |                              |          |
| Pb-Al              | ~.PRRLRTAYTNTQLLELEKEFHFNKYLCPRRRIEIAASLDLTERQVKVWFQNRMMKHKRQS.  |                              | AF071406 |
| Pb-Nvi             | N.PRRLRTAYTNTQLLELEKEFHFNKYLCPRRRIEIAASLDLTERQVKV                |                              | AF151664 |
| Pb-Dm              | L.PRRLRTAYTNTQLLELEKEFHFNKYLCPRRRIEIAASLDLTERQVKVWFQNRMMKHKRQT.L |                              | P31264   |
| Hox2-Bf            | S.SRRLRTVFTNTQLLELEKEFHFNKYLCPRRRIEIASYLDLNERQVKIWFQNRMMKQKRRD.T | T                            | Z35143   |
| Hoxa2-Mm           | G.SRRLRTAYTNTQLLELEKEFHFNKYLCPRRRIEIAALLDLTERQVKVWFQNRMMKHKRQT.Q | Q                            | P31245   |
| Hoxb2-Hs           | G.ARRLRTAYTNTQLLELEKEFHFNKYLCPRRRIEIAALLDLTERQVKVWFQNRMMKHKRQT.Q | Q                            | P14652   |
| PG-2 cons          | .3RRLRTAYTNTQLLELEKEFHFNKYLCPRR3EIAA3LDLTERQVKVWFQNRMMKHKRQT.    | (6)                          |          |
| PG-2 spec          | .---L--A--NT-----HF-K--C-P-----D-----H--QT.                      |                              |          |

## Gsh\* / Cnox-2

|             | 1~~~ ~~~10~~~ ~~~20~~~ ~~~30~~~ ~~~40~~~ ~~~50~~~ ~~~60           | Plac. Cnid. Arth. Chor. |
|-------------|-------------------------------------------------------------------|-------------------------|
| Trox-2 Ta   | R. TKRIRTAAYTSMQLELEKEEFNSRYLSRLRRIEIANMLNLSEKQVKIWFQNRVVKWKDK.N  | AF052038                |
| Anthox2 Nve | R. SKRIRTAAYTSMQLELEKEEFNSRYLSRLRRIEIANMLNLSEKQVKIWFQNRVVKWKDK.K  | AF085283                |
| Scox-2 Cx   | K. SKRIKTAYTSIQLELEKEEFQNNRYLSRLRRIEIANMLDLTEKQVKIWFQNRVVKWKDK.K  | AF124592                |
| Cnox-2 Ed   | K. SKRIRTAAYTSIQLELEKEEFQNNRYLSRLRRIEIANMLDLTEKQVKIWFQNRVVKWKDK.K | Kuhn et al. 1996        |
| Cnox-2 Hys  | K. VKRIRTAAYTSIQLELEKEEFQNNRYLSRLRRIEIANMLDLTEKQVKIWFQNRVVKWKDK.K | AF031953                |
| Cnox-2 Cv   | K. SKRIRTAAYTSIQLELEKEEFQNNRYLSRLRRIEIANMLDLTEKQVKIWFQNRVVKWKDK.K | X64626                  |
| Cnox-2 Hv   | K. SKRIRTAAYTSIQLELEKEEFQNNRYLSRLRRIEIANMLDLTEKQVKIWFQNRVVKWKDK.K | M62870, AJ277388        |
| Ind-Dm      | S. SKRIRTAFTSTQLELELEREFSHNAYLSRLRRIEIANRLRLSEKQVKIWFQNRVVKQKGG.S | AF095926                |
| Gsx-Bf      | .SRRMRTAFSSTQLELELEREFASNMYLSRLRRIEIAFLNLSEKQVKIWFQNRVVKHKKEA.    | AF052463                |
| Gsh1-Ol     | S. SKRMRTAFTSTQLELELEREFSNMYLSRLRRIEIAFLNLSEKQVKIWFQNRVVKHKKEG.K  | AF035573                |
| Gsh1-Mm     | .SKRMRTAFTSTQLELELEREFASNMYLSRLRRIEIAFLNLSEKQVKIWFQNRVVKHKKEG.K   | P31315                  |
| Gsh2-Mm     | N. GKRMRTAFTSTQLELELEREFSNMYLSRLRRIEIAFLNLSEKQVKIWFQNRVVKHKKEG.K  | S79041                  |
| Gsx cons    | .SKRIRTAAYTSIQLELEKEEF54N3YLSRLRRIEIA36L3LSEKQVKIWFQNRVVK3K34.    | (12)                    |
| dipl        | K. ---I-----2-----K--33-R-----Q--A3-D-----W--DK.K                 | (7)                     |
| tripl       | ---M-----T-----R--3S-M-----E--T3-N-----H--EG.                     | (5)                     |
| Gsx spec    | .S--i--A--S-----S-L-----K-----V-----.                             |                         |

## PG-9 / PG-10

|           | 1~~~ ~~~10~~~ ~~~20~~~ ~~~30~~~ ~~~40~~~ ~~~50~~~ ~~~60            | Neme. Ann. Arth. Ech. Uro. Chor. |
|-----------|--------------------------------------------------------------------|----------------------------------|
| Hox9-Ls   | R. TRKKRKPYPYTRYQTMVLENEFLNSYITRQKRWEISCKLHLTERQVKVWFQNRMRKMKKLN.A | Y16574                           |
| Post2-Nvi | R. QRKKRKPYPYTRYQTMVLENEFLNSYITRQKRWEISCKLHLTERQVKVWFQNRMRKMKKLN.E | AF151673                         |
| Post1-Nvi | H. MRKKRKPYSKYQIAELEKEEYVNNYITPKRWEISCKLHLTERQVKVWFQNRMRKMKKLN.D   | AF151672                         |
| AbdB-Dm   | T. VRKKRKPYSKYQIAELEKEEYVNNYITPKRWEISCKLHLTERQVKVWFQNRMRKMKKLN.R   | P09087                           |
| Hbx4-Tg   | S. GRKKRCPYTKYQTLLELEKEEFLNMYLTRDRRLEIARLLSLTERQVKIWFQNRMRKMKKLN.Q | P10179                           |
| Hox2-Sc   | N. GRKKRCPYTKYQTLLELEKEEFLNMYLTRDRRLEIARLLSLTERQVKIWFQNRMRKMKKLN.K | U05571                           |
| Hox9-Bf   | S. SRKKRCPYTKYQTLLELEKEEFLNMYLTRDRRLEIARLLSLTERQVKIWFQNRMRKMKKLN.K | Z35149                           |
| Hox10-Bf  | ~.~KRCRCPYTKYQTLLELEKEEFLNMYLTRDRRLEIARLLSLTERQVKIWFQNRMRKMKKLN.K  | Z35150                           |
| Hoxb9-Mm  | S. SRKKRCPYTKYQTLLELEKEEFLNMYLTRDRRLEIARLLSLTERQVKIWFQNRMRKMKKLN.K | P20615                           |
| Hoxc9-Mm  | S. TRKKRCPYTKYQTLLELEKEEFLNMYLTRDRRLEIARLLSLTERQVKIWFQNRMRKMKKLN.K | P09633                           |
| Hoxd9-Mm  | S. TRKKRCPYTKYQTLLELEKEEFLNMYLTRDRRLEIARLLSLTERQVKIWFQNRMRKMKKLN.K | P28357                           |
| Hoxa9-Mm  | S. TRKKRCPYTKYQTLLELEKEEFLNMYLTRDRRLEIARLLSLTERQVKIWFQNRMRKMKKLN.K | P09631                           |
| PG-9 cons | .6RKKR3PYTKYQ3LELEKEEF45N5YLTR4rR5Ev248L3LTERQVKIWFQNRMRK5K74.     | (12)                             |
| prot      | .5---K-----3-----45-4-I--3K-W---44-3-----4--44.                    | (5)                              |
| deut      | S.3---C-----T-----L-F-M-L--d--4---R-L-N-----M--32.                 | (7)                              |
| PG-9 spec | -----P--ky-T-----L-----N-----N                                     |                                  |

## Cnox-3

|            | 1~~~ ~~~10~~~ ~~~20~~~ ~~~30~~~ ~~~40~~~ ~~~50~~~ ~~~60              | Cnid.            |
|------------|----------------------------------------------------------------------|------------------|
| Scox-1 Cx  | S. RHRKRMTYSRNQILELEKEEFLYSRYLTKERRKDLSDSLRRLTERQIKIWFQNRRTKSKKER.K  | AF124591         |
| Scox-4 Cx  | C. KRRKRMTYSSQTLELEKEEFLYRNRYLTKERRKDLSDSLRRLTERQIKIWFQNRRTKSKKER.N  | AF124594         |
| Cnox-3 Ed  | .SKRKRTYSRRQIFELENEFNRSRYITREKRIELSMILNLTERQVKIWFQNRMRKMKKLN.T       | U41840           |
| Cnox-1 Ed  | .SKRKRTYSRRQIFELENEFNRSRYITREKRIELSMILNLTERQVKIWFQNRMRKMKKLN.T       | Kuhn et al. 1996 |
| Cnox-1 Hm  | H. SKRKRTYSRRQIFELENEFNRSRYITREKRIELSMILNLTERQVKIWFQNRMRKMKKLN.N     | Z22638           |
| Cnox-3 Hv  | H. SKRKRTYSRRQIFELENEFNRSRYITREKRIELSMILNLTERQVKIWFQNRMRKMKKLN.N     | AJ252182         |
| Anthox1 Nv | E. GKRKRMTYSSQTLELEKEEFLYRNRYLTKERRKDLSDSLRRLTERQIKIWFQNRMRMLWKKCN.A | Finnerty 1998    |
| Scox-3 Cx  | E. RRRKRMTYSSQTLELEKEEFLYRNRYLTKERRKDLSDSLRRLTERQIKIWFQNRMRMLWKKCN.T | AF124593         |
| cnox3 cons | .43RKR23YsR5Q14ELEKEEF4422FL4KERR5eL255L5LsERQvK2WFQNRMRK4K45.       | (7)              |
| cnox3 spec | ---K-----R-----E-----                                                |                  |

## Mox\* / Cnox-5

|            | 1~~~ ~~~10~~~ ~~~20~~~ ~~~30~~~ ~~~40~~~ ~~~50~~~ ~~~60             | Cnid. Plat. Ann. Vert. |
|------------|---------------------------------------------------------------------|------------------------|
| Cnox5-Hm   | ~.~KRCRCPYTKYQTLLELEKEEFLNMYLTRDRRLEIARLLSLTERQVKIWFQNRMRKMKKLN.Q   | Z22640                 |
| Dutarh2-Gt | K. QRKERTAFSKGQILELEKEEFAVHNYLTRLRVYELAVLNLNERQIKVWFQNRMRKMKKLN.G   | Z32525                 |
| Hrox1-Hr   | K. PRKERTAFSTKHQIQLELEKEEFAVHNYLTRLRVYELAVLNLNERQIKVWFQNRMRKMKKLN.G | S38380                 |
| Mox1-Mm    | K. ARKERTAFSTKHQIQLELEKEEFAVHNYLTRLRVYELAVLNLNERQIKVWFQNRMRKMKKLN.G | P32442                 |
| Mox2-Mm    | K. PRKERTAFSTKHQIQLELEKEEFAVHNYLTRLRVYELAVLNLNERQIKVWFQNRMRKMKKLN.G | P32443                 |
| Mox cons   | K. 3RKERTAFSTKHQIQLELEKEEFAVHNYLTRLRVYELAVLNLNERQIKVWFQNRMRKMKKLN.G | (5)                    |
| Mox spec   | K. ---E--AF-K-----HN----L--Y--V-----W--VK.G                         |                        |

## Caudal (Cdx)

|          | 1~~~ ~~~10~~~ ~~~20~~~ ~~~30~~~ ~~~40~~~ ~~~50~~~ ~~~60             | Neme. Arth. Chor. |
|----------|---------------------------------------------------------------------|-------------------|
| Cdx-Ls   | .PDKYRVVYTDYQRLELEKEEFHYSRYITIRKKAELAVSLGLSERQVKIWFQNRRAKERKIN.K    | P81193            |
| Cad-Bm   | T. KDKYRVVYSDHQRLLELEKEEFHYSRYITIRKKAELAVSLGLSERQVKIWFQNRRAKERKQV.K | D16683            |
| Cad-Dm   | T. KDKYRVVYTDYQRLELEKEEFHYSRYITIRKKAELAVSLGLSERQVKIWFQNRRAKERKTSN.K | P09085            |
| Cdx-Bf   | .KDKYRVVYSDHQRLLELEKEEFHYSRYITIRKKAELAVSLGLSERQVKIWFQNRRAKERKMA.    | AF052465          |
| Cdx1-Cc  | T. KEKYRVVYTDHQRLLELEKEEFHYSRYITIRKKAELAVSLGLSERQVKIWFQNRRAKERKLI.K | X80668            |
| Cdx-Cg   | T. KDKYRVVYTDHQRLLELEKEEFHYSRYITIRKKAELAVSLGLSERQVKIWFQNRRAKERKIN.K | X80614            |
| Cdx4-Mm  | T. KEKYRVVYTDHQRLLELEKEEFHYSRYITIRKKAELAVSLGLSERQVKIWFQNRRAKERKIN.K | Q07424            |
| Cdx1-Mm  | T. KDKYRVVYTDHQRLLELEKEEFHYSRYITIRKKAELAVSLGLSERQVKIWFQNRRAKERKIN.K | P18111            |
| Cdx2-Mm  | T. KDKYRVVYTDHQRLLELEKEEFHYSRYITIRKKAELAVSLGLSERQVKIWFQNRRAKERKIK.K | P43241            |
| cdx cons | T. KDKYRVVYTDHQRLLELEKEEFHYSRYITIRKKAELAVSLGLSERQVKIWFQNRRAKERK65.  | (9)               |
| cdx spec | T. KD-Y-VV--DH-R-----H--R----R--S-----G-----A-E-----.               |                   |

## Cnox-4

|            | 1~~~ ~~~10~~~ ~~~20~~~ ~~~30~~~ ~~~40~~~ ~~~50~~~ ~~~60          | Cnid. Plat. |
|------------|------------------------------------------------------------------|-------------|
| Cnox4-Ed   | P. AMRSRPFSSHQTRLEKEFLVCQVYTRRRRIELAFSLNLSEKQIKTWQNRVVKERKQK.K   | U41841      |
| Pnox6-Pn   | E. KMLRLTSFHSQNLILEKEEFLVNMVLTFRMRRIEMASALELGEKQIKIWFQNRVRLKCK.A | L41852      |
| cnox4 cons | .2MR2R2F2SHQ222LEKEFLV22YLTR2RRIE2A22L2L2EKQIK2WFQNRV222K22.     | (2)         |
| cnox4 spec | .-M-----F-SH-----LV-----K-----V-----.                            |             |

| <b>Lox*</b> |                                                                      | <b>Ann. Chor.</b>                         |  |
|-------------|----------------------------------------------------------------------|-------------------------------------------|--|
|             | 1~~~ ~~~10~~~ ~~~20~~~ ~~~30~~~ ~~~40~~~ ~~~50~~~ ~~~60              |                                           |  |
| Lox3-Ht     | D. NKTRTRTAYSRAQLLELEKEFEFHDYKISRPRRVELASSLNLTERHIKIWFQNRMRKWKKE.A   | Y09622                                    |  |
| Lox3a-Him   | D. NKTRTRTAYSRAQLLELEKEFEFHDYKISRPRRLELAASLNLTERHIKIWFQNRMRKWKKLE.S  | S79684                                    |  |
| Lox3b-Him   | D. NKTRTRTAYSRAQLLELEKEFEFHDYKISRPRRVELAASLNLTECHIKIWFQNRMRKWKKE.F.S | S79685                                    |  |
| Lox3c-Him   | D. NKTRTRTAYSRAQLLELEKEFEFHDYKISRPRRLELAASLNLTECHIKIWFQNRMRKWKKE.F.S | S79687                                    |  |
| Xlox-Bf     | ~. NKTRTRTAYTRGQLELEKEFEFHNKYISRPRRIELAAMLNLTERHIKIWFQNRMRKWKKEQ.    | AF052464                                  |  |
| Pdx1-Mm     | E. NKTRTRTAYTRAQLLELEKEFEFLNKYISRPRRVELAVMLNLTERHIKIWFQNRMRKWKKEE.D  | P52946                                    |  |
| Lox cons    | D. NKTRTRTAYSRAQLLELEKEFEFHY2KYISRPRRVELA42LNLTE2HIKIWFQNRMRKWK2K4E. | (6)                                       |  |
| Lox spec    | D. N--T--A--R--L-----HY-K----P-----N---H-----W---E                   |                                           |  |
| <b>PG-3</b> |                                                                      | <b>Neme. Ann. Arth. Chor.</b>             |  |
|             | 1~~~ ~~~10~~~ ~~~20~~~ ~~~30~~~ ~~~40~~~ ~~~50~~~ ~~~60              |                                           |  |
| Hox3-Ls     | P. PKRSRTAYTSAQLVELEKEFEFHNRYLCRRRIEMAALLNLSEKQIKIWFQNRMRKWKKQD.K    | Y16571                                    |  |
| Hox3-Nvi    | P. SKRARTAYNSAQLVELEKEFEFHNRYLCRRRIEMAALLSLSEKQIKIWFQNRMRKWKKQD.R    | AF151665                                  |  |
| Zen-Tc      | A. GKRRARTAYTSAQLVELEKEFEFHGKYLSPRRRIQIAENLNLSEKQIKIWFQNRMRKWKKEQ.K  | X97819                                    |  |
| Hox3-Cus    | P. AKRARTAYTSAQLVELEKEFEFHNRYLCRRRIEMANLLNLSEKQIKIWFQNRMRKWKKEQ.K    | AJ005643                                  |  |
| Hox3-Bf     | A. GKRRARTAYTSAQLVELEKEFEFHNRYLCRRRIVEMAAMLNLSEKQIKIWFQNRMRKWKKEQ.K  | P50901                                    |  |
| Hoxd3-Mm    | A. SKRVRTAYTSAQLVELEKEFEFHNRYLCRRRIEMANLLNLSEKQIKIWFQNRMRKWKKQD.K    | P09027                                    |  |
| Hoxb3-Mm    | A. SKRARTAYTSAQLVELEKEFEFHNRYLCRRRIVEMANLLNLSEKQIKIWFQNRMRKWKKQD.K   | P09026                                    |  |
| Hoxa3-Mm    | S. SKRARTAYTSAQLVELEKEFEFHNRYLCRRRIEMAALLNLSEKQIKIWFQNRMRKWKKQD.K    | P02831                                    |  |
| PG-3 cons   | .4KR4RTAYTSAQLVELEKEFEFHNRYLCRRRIEMA33LNLSEKQIKIWFQNRMRKWKKQD.K      | (8)                                       |  |
| PG-3 spec   | .-----A--SA-LV-----HF-R--C-P----M---N-----Y---DQ.K                   |                                           |  |
| <b>Ftz</b>  |                                                                      | <b>Arth.</b>                              |  |
|             | 1~~~ ~~~10~~~ ~~~20~~~ ~~~30~~~ ~~~40~~~ ~~~50~~~ ~~~60              |                                           |  |
| Ftz-Dh      | D. SKRTRQTYTRYQTLLELEKEFEFHNRYLTRRRRMDIAHALNLSEKQIKIWFQNRMRKSKKDR.T  | P48590                                    |  |
| Ftz-Dm      | D. SKRTRQTYTRYQTLLELEKEFEFHNRYLTRRRRIDIANALSLSEKQIKIWFQNRMRKSKKDR.T  | P02835                                    |  |
| Ftz-Tc      | G. NKTRTRQTYTRYQTLLELEKEFEFHNRYLTRRRRIEIAESLRLTERQIKIWFQNRMRKAKKDT.K | X97819                                    |  |
| Ftz cons    | .2KRTRQTYTRYQTLLELEKEFEFHNRYLTRRRR2dIA32L3LSEKQIKIWFQNRMRK2KKD2.     | (3)                                       |  |
| <b>PG-4</b> |                                                                      | <b>Neme. Ann. Arth. Chor.</b>             |  |
|             | 1~~~ ~~~10~~~ ~~~20~~~ ~~~30~~~ ~~~40~~~ ~~~50~~~ ~~~60              |                                           |  |
| Hox4-Ls     | E. SKRSRTAYTRHQILELEKEFEFHNRYLTRRRRIEIAHALDLSEKQIKIWFQNRMRKWKKEH.K   | P81192                                    |  |
| Dfd-Nvi     | D. SKRTRTAYTRHQVLELEKEFEFHNRYLTRRRRIEIAHALCLTERQIKIWFQNRMRKWKKEN.K   | AF151666                                  |  |
| Dfd-Af      | E. PKRQRTAYTRHQILELEKEFEFHNRYLTRRRRIEIAHSLCLSEKQIKIWFQNRMRKWKKDN.K   | X70078                                    |  |
| Dfd-Dm      | ~. PKRQRTAYTRHQILELEKEFEFHNRYLTRRRRIEIAHTLVLESEKQIKIWFQNRMRKWKKDN.K  | P07548                                    |  |
| Hox4-Bf     | ~. TKRSRTAYTRQVLELEKEFEFHNRYLTRRRRIEIAHSLGLTERQIKIWFQNRMRKWKKDN.R    | Z35144                                    |  |
| Chox1-4Gg   | E. PKRSRTAYTRQVLELEKEFEFHNRYLTRRRRIEIAHTLCLSEKQIKIWFQNRMRKWKKDH.K    | P17277                                    |  |
| Hoxb4-Mm    | E. PKRSRTAYTRQVLELEKEFEFHNRYLTRRRRIEIAHALCLSEKQIKIWFQNRMRKWKKDN.K    | M36654                                    |  |
| Hoxc4-Mm    | E. PKRSRTAYTRQVLELEKEFEFHNRYLTRRRRIEIAHSLCLSEKQIKIWFQNRMRKWKKDN.K    | Q08624                                    |  |
| Hoxa4-Mm    | ~. PKRSRTAYTRQVLELEKEFEFHNRYLTRRRRIEIAHTLCLTERQVQIKIWFQNRMRKWKKDN.K  | M27432                                    |  |
| Hoxd4-Mm    | ~. PKRSRTAYTRQVLELEKEFEFHNRYLTRRRRIEIAHTLCLSEKQIKIWFQNRMRKWKKDN.K    | P10628                                    |  |
| PG-4 cons   | .3KR3RTAYTR2QVLELEKEFEFHNRYLTRRRRIEIAH3L4LSEKQIKIWFQNRMRKWKKdN.K     | (10)                                      |  |
| prot        | .2--3-----2-i-----3-3-----                                           | (4)                                       |  |
| deut        | .2-----Q-V-----2-2-----                                              | (6)                                       |  |
| <b>PG-5</b> |                                                                      | <b>Neme. Ann. Arth. Echi. Chor.</b>       |  |
|             | 1~~~ ~~~10~~~ ~~~20~~~ ~~~30~~~ ~~~40~~~ ~~~50~~~ ~~~60              |                                           |  |
| Scr-Dm      | Q. TKRQRTSYTRYQTLLELEKEFEFHNRYLTRRRRIEIAHALCLTERQIKIWFQNRMRKWKKEH.K  | P09077                                    |  |
| Scr-Nvi     | E. SKRTRTSYTRHQTLLELEKEFEFHNRYLTRRRRIEIAHALNLTERQIKIWFQNRMRKWKKEH.K  | AF151667                                  |  |
| Lox1-Him    | D. NKRLRTSYSRQTLLELEKEFEFHNRYLTRRRRIEIAQMLKLSERQIKIWFQNRMRKWKKEN.S   | L07298                                    |  |
| Lox20-Ht    | D. NKTRRTSYTRHQTLLELEKEFEFHNRYLTRRRRIEIAHVLNLSEKQIKIWFQNRMRKWKKDH.P  | AF006638                                  |  |
| Lox6-Hr     | A. DKRARTSYTRYQTLLELEKEFEFHNRYLNRRRIEIAHSLGLTERQIKIWFQNRMRKWKKDN.R   | AF004386                                  |  |
| Hehbox9-He  | P. SKRSRTAYTRYQTLLELEKEFEFHNRYLTRRRRIEIAHALGLTERQIKIWFQNRMRKWKKEH.N  | U31563                                    |  |
| Hox5-Ci     | P. SKRTRTAYTRYQTLLELEKEFEFHNRYLTRRRRIEVAHTLCLTERQIKIWFQNRMRKWKKEN.K  | AJ002028                                  |  |
| Hox5-Bf     | D. NKTRTRTAYTRYQTLLELEKEFEFHNRYLTRRRRIEIAHALCLTERQIKIWFQNRMRKWKKEN.K | Z35145                                    |  |
| Hoxa5-Rn    | E. GKRRARTCYTRYQTLLELEKEFEFHNRYLTRRRRIEIAHALCLSEKQIKIWFQNRMRKWKKDK.  | P52949                                    |  |
| PG-5 cons   | .5KR5RT3YTR3QTLLELEKEFEFHNRYLTRRRRIEIAH5L4LTERQIKIWFQNRMRKWKKE3.     | (9)                                       |  |
| prot        | .4--5--S---3-----4-4-----2.                                          | (6)                                       |  |
| deut        | .3--3--2---Y-----2-C-----2.                                          | (3)                                       |  |
| <b>PG-6</b> |                                                                      | <b>Plat. Neme. Ann. Arth. Echi. Chor.</b> |  |
|             | 1~~~ ~~~10~~~ ~~~20~~~ ~~~30~~~ ~~~40~~~ ~~~50~~~ ~~~60              |                                           |  |
| Dutarh4-Gt  | E. YKRCRQAYSRAQTLLELEKEFEFYNYQLTRRRRIEIANVCLSEKQIKIWFQNRMRKWKKDV.    | Z34089                                    |  |
| Dutarh3-Gt  | D. HKRSRQTYTRYQTLLELEKEFEFHNRYLTRRRRIEIAHGLSLTERQIKIWFQNRMRKWKKDH.N  | Z34091                                    |  |
| Hox6-Ls     | E. QKRTRQTYTRYQTLLELEKEFEFHNRYLTRRRRIEIAHALGLTERQIKIWFQNRMRKWKKEN.N  | Y16572                                    |  |
| Lox5-Nvi    | E. QKRTRQTYTRYQTLLELEKEFEFHNRYLTRRRRIEIAHALGLTERQIKIWFQNRMRKWKKEN.N  | AF151671                                  |  |
| Lox5-Hr     | D. QKRTRQTYTRYQTLLELEKEFEFYNYQLTRRRRIEIAHSLALSEKQIKIWFQNRMRKWKKEN.N  | AF004387                                  |  |
| Antp-Dm     | E. RKRGRQTYTRYQTLLELEKEFEFHNRYLTRRRRIEIAHALCLTERQIKIWFQNRMRKWKKEN.K  | P02833                                    |  |
| Hbx3-Tg     | D. GKRGRQTYTRYQTLLELEKEFEFHSRYVTRRRRIEIAQSLGLSEKQIKIWFQNRMRKWKKEH.G  | P10178                                    |  |
| Pahbox6-Pa  | D. RKRGRQTYTRAQTLLELEKEFEFHNRYLTRRRRIEIAQAVCLSEKQIKIWFQNRMRKWKKER.V  | X54494                                    |  |
| Hox6-Bf     | E. KKRGRQTYTRYQTLLELEKEFEFHNRYLTRRRRIEIAHLLGLTERQIKIWFQNRMRKWKKEN.K  | Z35146                                    |  |
| Hox6-Br     | ~. ~RRGRQIYSRYQTLLELEKEFEFHNRYLTRRRRIEIAHTLCLSEKQIKIWFQNRMRKWKKES.N  | Y14537                                    |  |
| Hoxb6-Gg    | P. ARRGRQTYTRYQTLLELEKEFEFHNRYLTRRRRIEIAHSLCLTERQIKIWFQNRMRKWKKEN.K  | P14839                                    |  |
| Hoxa6-Mm    | H. GRRGRQTYTRYQTLLELEKEFEFHNRYLTRRRRIEIANALCLTERQIKIWFQNRMRKWKKEN.K  | P09092                                    |  |
| Hoxb6-Mm    | S. GRRGRQTYTRYQTLLELEKEFEFHNRYLTRRRRIEIAHALCLTERQIKIWFQNRMRKWKKES.K  | P09023                                    |  |
| Hoxc6-Mm    | D. RRRGRQIYSRYQTLLELEKEFEFHNRYLTRRRRIEIANALCLTERQIKIWFQNRMRKWKKEL.Q  | P10629                                    |  |
| PG-6 cons   | .7KR4RQTYTR3QTLLELEKEF23NRYLTRRRRIEIA35L4LTERQIKIWFQNRMRKWKKE5.      | (14)                                      |  |
| prot        | e.3K-4-----2-----23-r-----H3-4-----e3.N                              | (6)                                       |  |
| deut        | .4r-G-----3-----Hf-----34-2-----E4.                                  | (8)                                       |  |

| PG-7      |                                                                    | Plat. Neme. Ann. Arth. Echi. Chor. |  |
|-----------|--------------------------------------------------------------------|------------------------------------|--|
| Hox7-Ls   | D.RKRGRQTYTRYQTLELEKEFEHFHNKYLTRRRRIEIAHALCLTERQIKIWFQNRMRKWKKE.K  | Y16753                             |  |
| Ubx Dm    | L.RRRGRQTYTRYQTLELEKEFEFHNHYLTRRRRIEMAHALCLTERQIKIWFQNRMRKWKKEI.Q  | P02834                             |  |
| Hox7-Bf   | E.RKRGRQTYTRYQTLELEKEFEHFHNKYLTRRRRIEIAHALCLTERQIKIWFQNRMRKWKKE.K  | Z35147                             |  |
| Hoxa7-Mm  | D.RKRGRQTYTRYQTLELEKEFEHFHNRYLTRRRRIEIAHALCLTERQIKIWFQNRMRKWKKEH.K | P02830                             |  |
| Hoxb7-Mm  | D.RKRGRQTYTRYQTLELEKEFEHFHNRYLTRRRRIEIAHTLCLTERQIKIWFQNRMRKWKKE.K  | P09024                             |  |
| PG-7 cons | .RKRGRQTYTRYQTLELEKEFEHFNRyLrTRRRRIEIAHALCLTERQIKIWFQNRMRKWKKE.K   | (5)                                |  |

| PG-8      |                                                                    | Plat. Neme. Ann. Arth. Echi. Chor. |  |
|-----------|--------------------------------------------------------------------|------------------------------------|--|
| Pnox1a-Pn | Q.KRRGRQTYSRHQTLLELEKEFEFQFNHYLTRRRRIEIAHNLCLSERQIKIWFQNRMRKWKKE.Q | L41845                             |  |
| Dthoxf-Gt | Q.KRRGRQTYSRHQTLLELEKEFEFQFNHYLTRRRRIEIAHNLCLSERQIKIWFQNRMRKWKKE.Q | X95412                             |  |
| Lox2-Him  | Q.RRRGRQTYTRYQTLELEKEFEFHNRYLTRRRRIEISHTLYLTERQIKIWFQNRMRKWKKEV.Q  | P21523                             |  |
| Lox4-Him  | Q.RRRGRQTYTRYQTLELEKEFEFQFNRYLTRRRRIEIAHCLCLTERQIKIWFQNRMRKWKKEV.Q | S79240                             |  |
| Lox4-Nvi  | E.EERGRQTYTRYQTLELEKEFEFHNRYLTRRRRIEIAHVLCLTEHQIKIWFQNRMRKWKKE.L   | Af151669                           |  |
| abdA-Dm   | P.RRRGRQTYTRYQTLELEKEFEFHNRYLTRRRRIEIAHALCLTERQIKIWFQNRMRKWKKE.L   | P29555                             |  |
| Hbx1-Tg   | G.RKRGRQTYTRYQTLELEKEFEFHNRYLTRRRRIEISHLGLTERQIKIWFQNRMRKWKKE.K    | P09080                             |  |
| Hox8-Bf   | E.RRRGRQTYTRYQTLELEKEFEFHNRYLTRRRRIEIAHALGLTERQIKIWFQNRMRKWKKEA.A  | Z35148                             |  |
| PG-8 cons | .rkrgrqtytr3qtlelekef4fn3yltrrrrieiah6l3lterqikiwfqnrrmk5kke7.     | (8)                                |  |
| prot      | .-R-----3-----4--2-----5-C-----1---5.Q                             | (6)                                |  |
| deut      | .R-----Y-----H--k-----2-2-G-----2---3.                             | (2)                                |  |

| Orphans    |                                                                   | Plat. Neme. Ann. Arth. Uro. |  |
|------------|-------------------------------------------------------------------|-----------------------------|--|
|            | 1~~~ ~~~10~~~ ~~~20~~~ ~~~30~~~ ~~~40~~~ ~~~50~~~ ~~~60           |                             |  |
| Hox3-Sp    | N.GRKRVPYTKYQLLELEKEFEFHNQYLSRERRQEVAKAVSLSDRQVKIWFQNRMRKWKKE.K   | U05600                      |  |
| Zen-Dm     | K.SKRSTAFSSQLIELEEFHNLKYLARTRRRIEISQLALTERQVKIWFQNRMRKWKKE.N      | P09090                      |  |
| Dthoxg-Gt  | T.SKRCRSAYTNNQLVELEKEFEFHNRYLARGRRTELSKQLLLTERQVKIWFQNRMRKWKKE.K  | X95411                      |  |
| Dutarh1-Gt | R.RVSAIAYTNNQLVELEKEFEFHNRYLARGRRTELSKQLLLTERQVKIWFQNRMRKWKKE.K   | Z34090                      |  |
| Cehl3-Ce   | V.IDENQNYTRAQTHELEKEFEFHNKTATRVNRTIEITAALSNNKRQVAIWFQNRMRKWKKE.K  | X17077                      |  |
| Mab5-Ce    | E.SKRTRQTYSRQTLLELEKEFEFHNRYLTKRRRQEISETLHLTERQVKIWFQNRMRKWKKEA.K | P10038                      |  |
| Cehl1-Ce   | V.SKKGRQTYQRYQTSVLEAKFQSSYVSKQREELRLQTLQTLDRQIKIWFQNRMRKWKKE.Q    | P17486                      |  |
| Lin39-Ce   | G.EKRQRTAYTRNQVLELEKEFEFHNRYLTKRRRIEVAHSLMLTERQVKIWFQNRMRKWKKE.K  | L19639                      |  |
| Dthoxa-Gt  | D.SKRNRATYTRQILELEKEFEFHNRYLTKRRRIEIAQSLQSESVQVKIWFQNRMRKWKKE.H   | X95414                      |  |
| Dthoxd-Gt  | E.YKRCRQAYSQQTLLELEKEFEFHNRYLTKRRRIEIANVCLSERQIKIWFQNRMRKWKKEV.V  | X95417                      |  |

## Phylum code

|        |                 |
|--------|-----------------|
| Ann.:  | Annelida        |
| Arth.: | Arthropoda      |
| Chor.: | Chordata        |
| Cnid.: | Cnidaria        |
| Echi.: | Echinodermata   |
| Nema.: | Nematoda        |
| Neme.: | Nemerta         |
| Plac.: | Placozoa        |
| Plat.: | Platyhelminthes |
| Pori.: | Porifera        |
| Pria.: | Priapulides     |
| Uro.:  | Urochordata     |
| Vert.: | Vertebrata      |

## Species Code

Porifera: Ef, Em: *Ephydatia fluviatilis*, *E. muelleri*;  
Placozoa: Ta: *Trichoplax adhaerens*;  
Cnidaria: Af, Am: *Acropora formosa*, *A. millipora*, Nve: *Nematostella vectensis* (anth.);  
Cx: *Cassiopeia xamachana* (scyph.); Cv: *Chlorohydra viridissima*; Ed: *Eleutheria dichotoma*; Hl, Hm, Hv: *Hydra littoralis*; H. *magnipapillata*, *H. vulgaris*; Hys: *Hydractinia symbiolongicarpus*, Pc: *Podocorynae carnea* (hydroz.);  
Platyhelminthes: Gt: *Girardia tigrina*, Pn: *Polycelis nigra* (planaria); Eg: *Echinococcus granulosa*;  
Nemertea: Ls: *Linneus sanguineus*;  
Annelida: Him: *Hirudo medicinalis*, Hsp, Ht: *Helobdella sp.*, *H. triserialis* (leech), Nvi: *Nereis virens*;  
Nematoda: Ce: *C. elegans*;  
Arthropods: Afr: *Artemia franciscana* (shrimp); Al: *Archegozetes longisetosus* (acari); Bm: *Bombyx mori* (silkworm); Da, Dh, Dm: *Drosophila ananassae*; *D. hydei*; *D. melanogaster* (flies), Jc: *Junonia coenia* (butterfly), Sa: *Schistocerca americana*; Tc: *Tribolium castaneum* (beetle);  
Echinodermata: He: *Heliocidaris erythrogramma*, Hp: *Hemicentrotus pulcherrimus*, Pa: *Parechinus angulosus*, Pl: *Purpuratus lividus*, Sp: *Strongylocentrotus purpuratus*, Tg: *Tripeustes gratilla* (sea urchin);  
Urochordates: Ci: *Ciona intestinalis*, Hr: *Halocynthia roretzi*, Sc: *Styela clava*; St: *Styela plicata* (ascidia);  
Cephalochordates: Bf: *Branchiostoma floridae* (amphioxus);  
Vertebrates: Br: *Brachydanio rerio*, Cc: *Cyprinus carpio*, Ol: *Oryzia latipes* (fish), Ame: *Ambystoma mexicanus* (axolotl), Xl: *Xenopus laevis*, Gg: *Gallus gallus* (chick), Ma: *Mesocricetus auratus* (hamster), Mm: *Mus musculus*; Rn: *Rattus norvegicus*; Hs: *Homo sapiens*.
